# Supplementary material
Source: PubMed Central journal article supplement (PMC9523384)
Supplement: mmc1.pdf [file mmc1.pdf]

# **Impact of the COVID-19 pandemic on the care and outcomes of patients with NAFLD-related cirrhosis**

Jesús Rivera-Esteban, Ramiro Manzano-Nuñez, Teresa Broquetas, Isabel Serra-Matamala, Octavi Bassegoda, Agnès Soriano-Varela, Gemma Espín, Joaquín Castillo, Juan Bañares, José Carrión, Pere Ginès, Isabel Graupera,  
Juan M Pericàs

Table of contents

|               |   |
|---------------|---|
| Table S1..... | 2 |
|---------------|---|

**Table S1. Baseline characteristics of the cohort according to Child-Pugh classification.**

|                                                           | <b>Overall<br/>n=354</b> | <b>Child A<br/>n=287</b> | <b>Child B-C<br/>n=43</b> | <b>p<br/>value</b> |
|-----------------------------------------------------------|--------------------------|--------------------------|---------------------------|--------------------|
| <b>Age, mean years (SD)</b>                               | 67.3 (9.6)               | 66.9 (9.2)               | 68.8 (10.5)               | 0.11               |
| <b>Females, n (%)</b>                                     | 171 (48.3)               | 138 (48.1)               | 19 (44.2)                 | 0.63               |
| <b>Tobacco use, n (%)</b>                                 | 38 (10.8)                | 32 (11.1)                | 3 (7.0)                   | 0.21               |
| <b>Alcohol use, n (%)*</b>                                | 76 (21.5)                | 62 (21.6)                | 11 (25.6)                 | 0.57               |
| <b>Body Mass Index, median<br/>kg/m<sup>2</sup> (IQR)</b> | 31.2 (27.6-35.1)         | 31.8 (27.8-35.3)         | 30.2 (26.9-32.9)          | 0.023              |
| <b>BMI ≥ 25 kg/m<sup>2</sup>, n (%)</b>                   | 302 (92.9)               | 249 (92.9)               | 35 (94.6)                 | 0.70               |
| <b>BMI ≥ 30 kg/m<sup>2</sup>, n (%)</b>                   | 188 (57.8)               | 152 (56.7)               | 23 (62.2)                 | 0.53               |
| <b>Arterial hypertension, n (%)</b>                       | 251 (70.9)               | 206 (71.8)               | 29 (67.4)                 | 0.55               |
| <b>T2D, n (%)</b>                                         | 258 (72.9)               | 214 (74.6)               | 28 (65.1)                 | 0.19               |
| <b>Dyslipidaemia, n (%)</b>                               | 181 (51.1)               | 156 (54.4)               | 15 (34.9)                 | 0.017              |
| <b>Previous stroke, n (%)</b>                             | 16 (4.5)                 | 12 (4.2)                 | 3 (7.0)                   | 0.41               |
| <b>Previous ischemic heart<br/>disease, n (%)</b>         | 35 (9.9)                 | 31 (10.8)                | 3 (7.0)                   | 0.44               |
| <b>Liver stiffness, mean kPa<br/>(SD)**</b>               | 23.6 (14.8)              | 22.9 (13.8)              | 33.9 (25.4)               | 0.10               |
| <b>CAP, mean dB/m (SD)***</b>                             | 307.0 (58.0)             | 308.1 (57.6)             | 281.3 (77.6)              | 0.43               |

\*Alcohol intake was defined as <20 gr/day and <30gr/day for women and men, respectively.

\*Data available in 83 subjects.

\*\*Data available in 75 subjects.
